# Supplementary material
Source: publisher site journal article supplement (https://www.dovepress.com/article/534378)

A

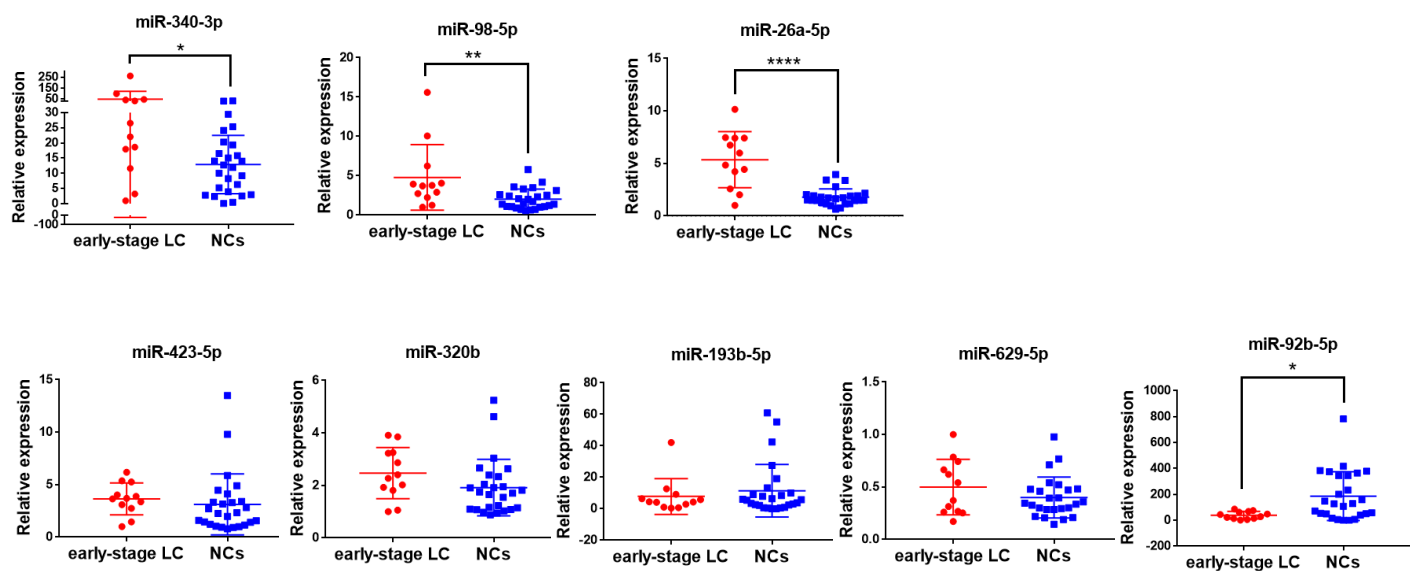

Supplement: Supplementary file 1 [file Supplementary Figure1.pdf › Supplementary Figure1.pdf]
